# Supplementary material
Source: MDPI journal article supplement (https://www.mdpi.com/2227-9717/9/11/1983)
Supplement: s1 [file s1]

## ***In silico* assessment and molecular docking studies of some phyto-triterpenoid for potential disruption of mortalin-p53 interaction**

Minh Quan Pham<sup>1,2,\*</sup>, Thuy Huong Le Thi<sup>1,2</sup>, Quoc Long Pham<sup>1,2</sup>, Le Thi Le<sup>3</sup>, Huy Toan Dao<sup>3</sup>, Thanh Le Thi Dang<sup>4</sup>, Dung Thuy Nguyen Pham<sup>5,6</sup> and Hai Ha Pham Thi<sup>7,\*\*</sup>

<sup>1</sup> Institute of Natural Products Chemistry, Vietnam Academy of Science and Technology, Hanoi 100000, Vietnam; [pham-minh.quan@inpc.vast.vn](mailto:pham-minh.quan@inpc.vast.vn) (M.Q.P.), [thuyhuong0102sp2@gmail.com](mailto:thuyhuong0102sp2@gmail.com) (T.H.L.T.), [mar.biochem@fpt.vn](mailto:mar.biochem@fpt.vn) (Q.L.P.)

<sup>2</sup> Graduate University of Science and Technology, Vietnam Academy of Science and Technology, Hanoi 100000, Vietnam; [pham-minh.quan@inpc.vast.vn](mailto:pham-minh.quan@inpc.vast.vn) (M.Q.P.), [thuyhuong0102sp2@gmail.com](mailto:thuyhuong0102sp2@gmail.com) (T.H.L.T.), [mar.biochem@fpt.vn](mailto:mar.biochem@fpt.vn) (Q.L.P.)

<sup>3</sup> Hanoi University of Science and Technology, Hanoi 100000, Vietnam; (L.T.L.), (H.T.D.)

<sup>4</sup> Faculty of Chemistry and Environment, Thuyloi University, Hanoi 100000, Vietnam (T.L.T.D.)

<sup>5</sup> NTT Hi-Tech Institute, Nguyen Tat Thanh University, Ho Chi Minh City 700000, Vietnam; [pntdung@nttu.edu.vn](mailto:pntdung@nttu.edu.vn) (D.T.N.P.)

<sup>6</sup> Center of Excellence for Biochemistry and Natural Products, Nguyen Tat Thanh University, Ho Chi Minh City 700000, Vietnam; [pntdung@ntt.edu.vn](mailto:pntdung@ntt.edu.vn) (D.T.N.P.)

<sup>7</sup> Faculty of Biotechnology, Nguyen Tat Thanh University, Ho Chi Minh City 700000, Vietnam; [pthha@ntt.edu.vn](mailto:pthha@ntt.edu.vn) (H.H.P.T.)

\*, \*\* Correspondence: \* [pham-minh.quan@inpc.vast.vn](mailto:pham-minh.quan@inpc.vast.vn) (M.Q.P.); \*\* [pthha@ntt.edu.vn](mailto:pthha@ntt.edu.vn) (H.H.P.T.)

| S.No. | Contents                                 | Page No. |
|-------|------------------------------------------|----------|
| 1     | Structure of studied compounds           | 2-5      |
| 2     | Detailed description for docking studies | 6-10     |

## S1. Structure of studied compounds

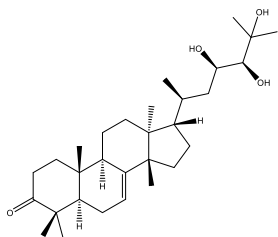

3-oxo-threo-23,24,25-trihydroxytirucall-7-ene (**1**)

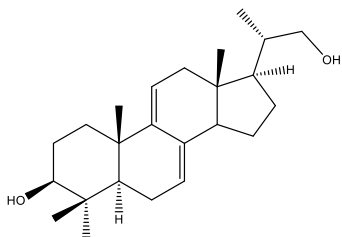

23,24,25,26,27-pentanorlanost-7,9(11)-dien-3 $\beta$ ,22-diol (**2**)

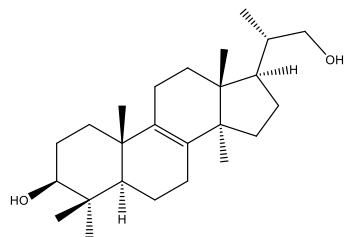

23,24,25,26,27-pentanorlanost-8-en-3 $\beta$ ,22-diol (**3**)

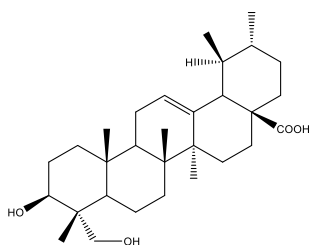

23-hydroxyursolic acid (**4**)

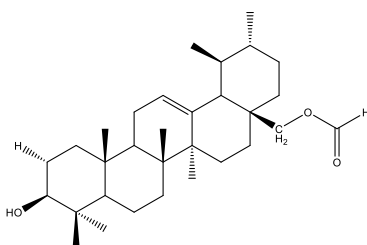

28-formyloxy-3 $\beta$ -hydroxy-urs-12-ene (**5**)

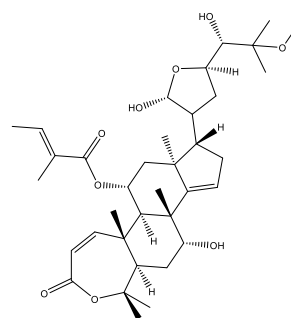

Ailanaltiolide A (**6**)

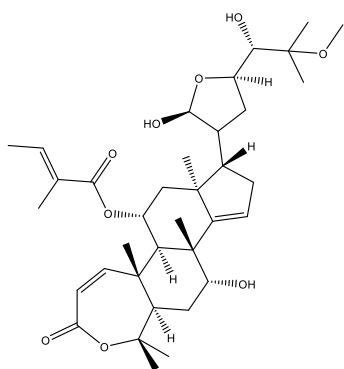

Ailanaltiolide B (**7**)

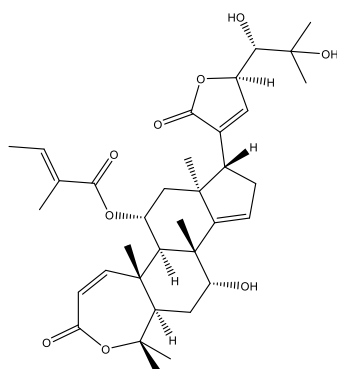

Ailanaltiolide C (**8**)

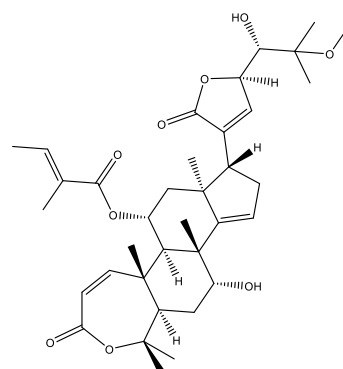

Ailanaltiolide D (**9**)

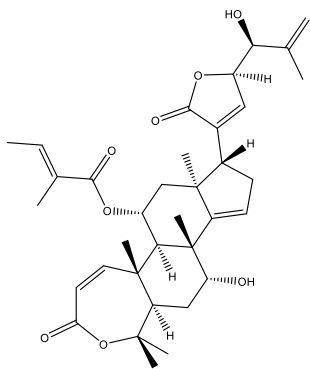

Ailanaltiolide E (10)

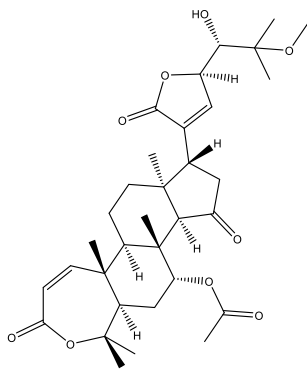

Ailanaltiolide F (11)

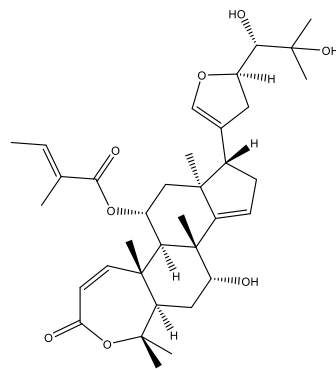

Ailanaltiolide G (12)

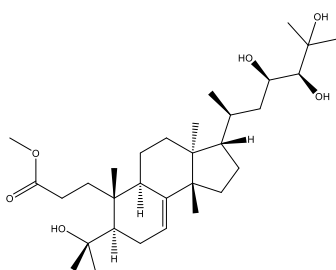

Ailanaltiolide H (13)

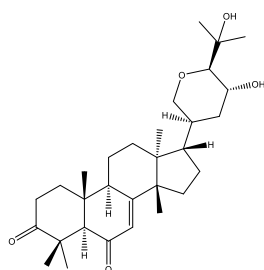

Ailanaltiolide I (14)

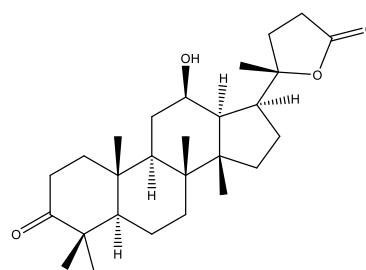

Ailanaltiolide J (15)

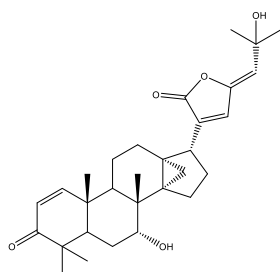

Ailanthusin A (16)

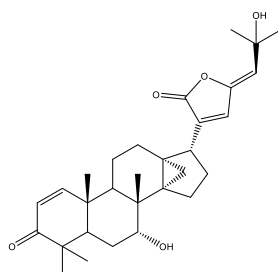

Ailanthusin B (17)

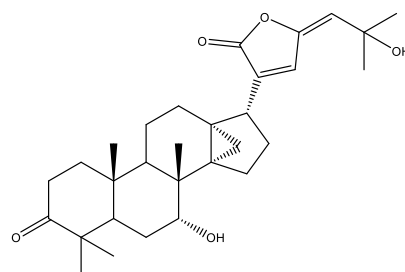

Ailanthusin C (18)

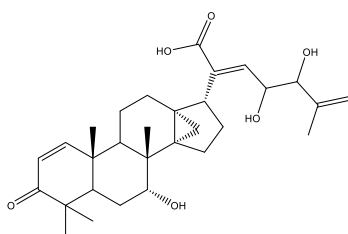

Ailanthusin D (19)

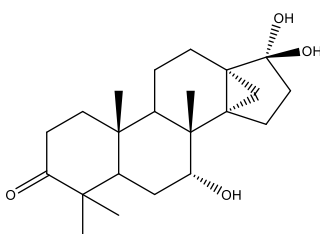

Ailanthusin E (20)

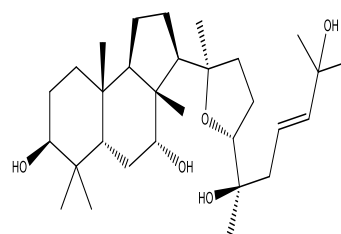

Ailanthusin F (21)

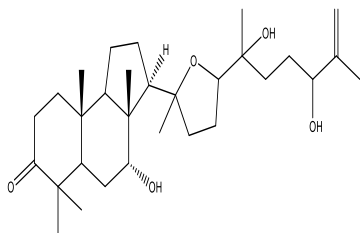

Ailanthusin G (22)

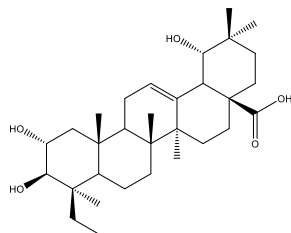

Arjunic acid (23)

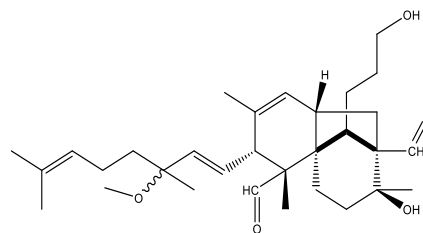

Belamchinenin A (24)

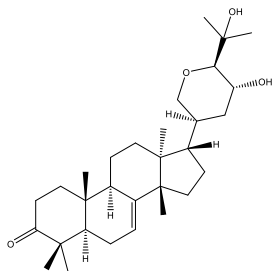

Bourjutinolone A (25)

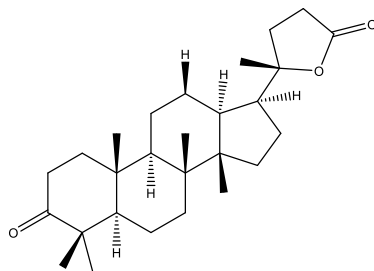

Cabralealactone (26)

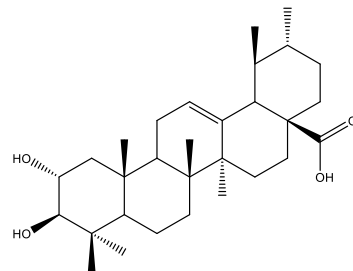

Corosolic acid (27)

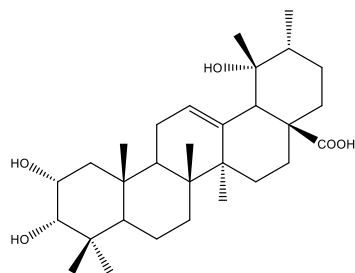

Euscaphic acid (28)

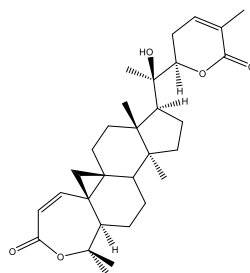

Kadsuphilactone B (29)

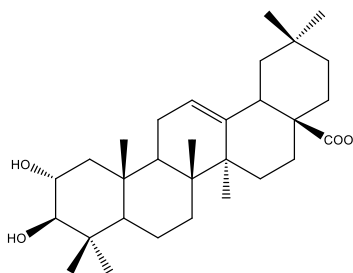

Maslinic acid (30)

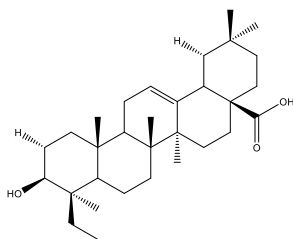

Oleanolic acid (31)

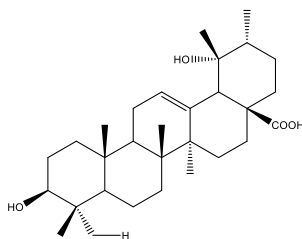

Pomolic acid (32)

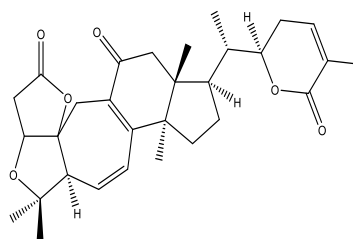

Schincheninlactone A (33)

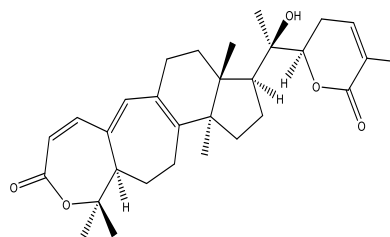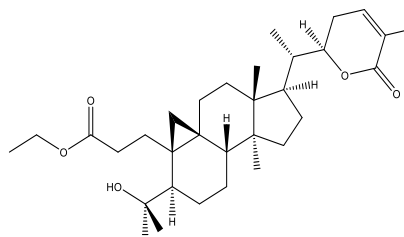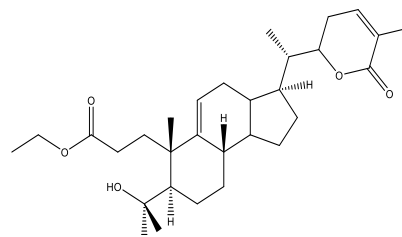

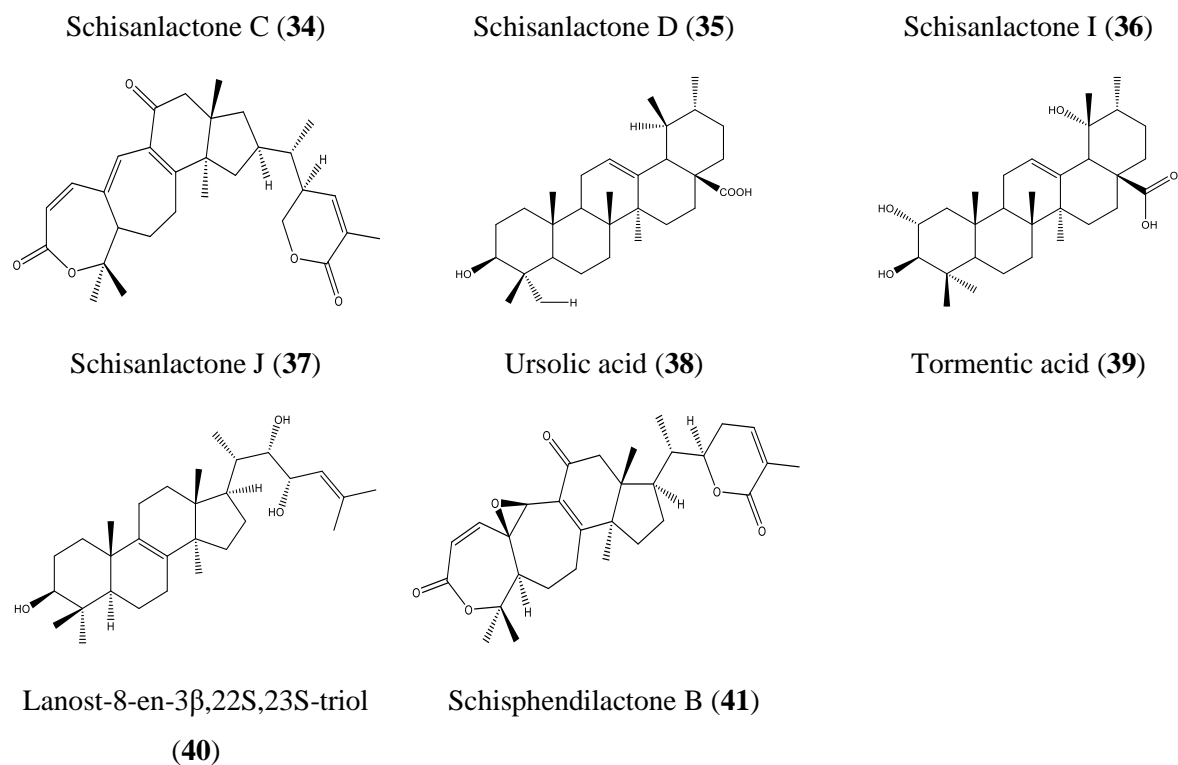

**Figure S1.** Structure of 41 studied phyto triterpenes

## S2. Detailed description for docking studies

**Table S1.** Pharmacokinetic parameters and toxicity prediction of studied compounds

| Compound ID | miLogP <sup>a</sup> | TPSA (Å <sup>2</sup> ) <sup>b</sup> | LD <sub>50</sub><br>(mg/kg) | Toxicity<br>prediction <sup>c</sup> |
|-------------|---------------------|-------------------------------------|-----------------------------|-------------------------------------|
| 1           | 5.30                | 77.75                               | 5010                        | 6                                   |
| 2           | 5.26                | 40.46                               | 1190                        | 4                                   |
| 3           | 5.53                | 40.46                               | 2000                        | 4                                   |
| 4           | 5.61                | 77.75                               | 2000                        | 4                                   |
| 5           | 7.33                | 46.53                               | 4800                        | 5                                   |
| 6           | 5.79                | 131.76                              | 590                         | 4                                   |
| 7           | 5.79                | 131.76                              | 590                         | 4                                   |
| 8           | 5.52                | 139.6                               | 400                         | 4                                   |
| 9           | 6.14                | 128.6                               | 400                         | 4                                   |
| 10          | 6.53                | 119.37                              | 1000                        | 4                                   |
| 11          | 4.90                | 125.45                              | 1000                        | 4                                   |
| 12          | 5.57                | 122.53                              | 1000                        | 4                                   |
| 13          | 4.84                | 107.22                              | 5000                        | 5                                   |
| 14          | 4.30                | 83.83                               | 1000                        | 4                                   |
| 15          | 3.68                | 63.60                               | 4400                        | 5                                   |
| 16          | 3.83                | 87.74                               | 5105                        | 6                                   |
| 17          | 3.83                | 87.74                               | 5105                        | 6                                   |
| 18          | 3.86                | 87.74                               | 250                         | 3                                   |
| 19          | 3.52                | 115.05                              | 9000                        | 6                                   |
| 20          | 2.35                | 77.75                               | 1000                        | 4                                   |
| 21          | 5.04                | 90.15                               | 6000                        | 6                                   |
| 22          | 4.97                | 86.99                               | 5000                        | 5                                   |
| 23          | 5.23                | 97.98                               | 2000                        | 4                                   |
| 24          | 5.90                | 83.83                               | 1410                        | 4                                   |
| 25          | 5.40                | 66.76                               | 1000                        | 4                                   |
| 26          | 4.59                | 43.38                               | 4400                        | 5                                   |
| 27          | 5.87                | 77.75                               | 2000                        | 4                                   |
| 28          | 4.93                | 97.98                               | 2000                        | 4                                   |
| 29          | 6.02                | 72.84                               | 7                           | 2                                   |
| 30          | 5.81                | 77.75                               | 2000                        | 4                                   |
| 31          | 7.06                | 57.53                               | 2000                        | 4                                   |
| 32          | 5.84                | 77.75                               | 2000                        | 4                                   |
| 33          | 3.36                | 78.92                               | 50                          | 2                                   |
| 34          | 6.24                | 72.84                               | 55                          | 3                                   |
| 35          | 6.56                | 72.84                               | 333                         | 4                                   |
| 36          | 6.62                | 72.84                               | 333                         | 4                                   |

|                     |             |              |          |          |
|---------------------|-------------|--------------|----------|----------|
| 37                  | 6.20        | 69.68        | 100      | 3        |
| 38                  | 5.52        | 82.21        | 1000     | 4        |
| 39                  | 4.93        | 97.98        | 2000     | 4        |
| 40                  | 6.55        | 60.68        | 667      | 4        |
| 41                  | 6.79        | 57.53        | 2000     | 4        |
| <b>Withanone</b>    | <b>4.15</b> | <b>96.36</b> | <b>7</b> | <b>2</b> |
| <b>Withaferin A</b> | <b>3.86</b> | <b>96.36</b> | <b>7</b> | <b>2</b> |

<sup>a</sup> Calculated octanol/water partition coefficient

<sup>b</sup> Molecular total polar surface area

<sup>c</sup> Toxicity prediction class: 1 → 6 (High toxicity to non-toxic)

**Table S2.** The H-bond interactions between potential compounds and Mortalin model 3N8E

| Compound ID         | No. of H-bonds | Interacting residues                                  |
|---------------------|----------------|-------------------------------------------------------|
| 21                  | 4              | Leu450; Glu483; Arg513; Asn583                        |
| 22                  | 3              | Glu448; Glu483; Arg513                                |
| 19                  | 2              | Ser473; Arg513                                        |
| 34                  | 3              | Leu450; Arg513                                        |
| 38                  | 3              | Thr474; Arg513; Glu580                                |
| 16                  | 2              | Arg513; Asn583                                        |
| 17                  | 1              | Gln479                                                |
| 14                  | 4              | Leu450; Gly514; Gln517                                |
| 18                  | 3              | Ser473; Arg513; Asn583                                |
| <b>Withanone</b>    | <b>3</b>       | <b>Thr449; Thr455; Arg513</b>                         |
| <b>Withaferin A</b> | <b>6</b>       | <b>Phe454; Lys456; Ser473; Thr474; Arg513; Lys576</b> |

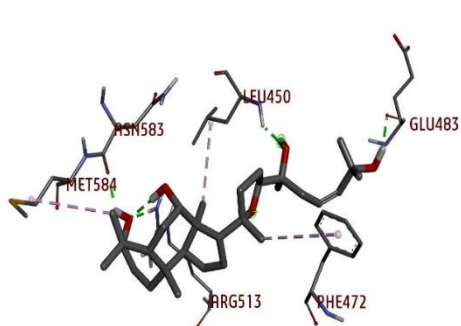

**A**

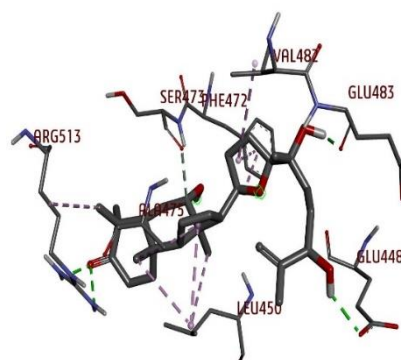

**B**

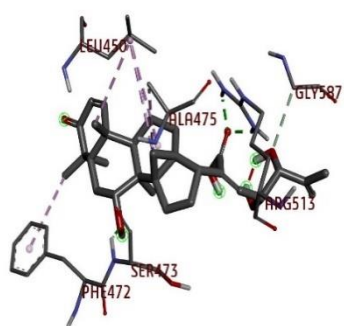

**C**

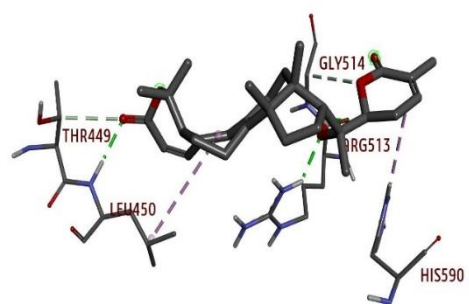

**D**

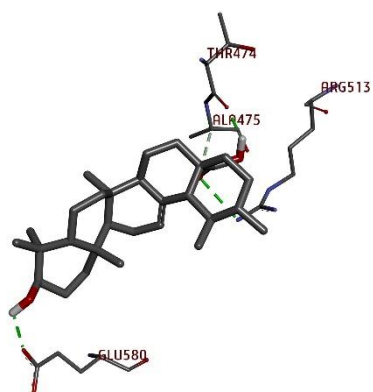

**E**

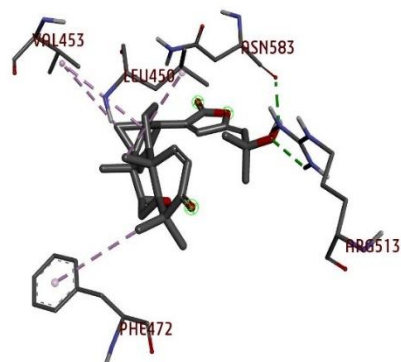

**F**

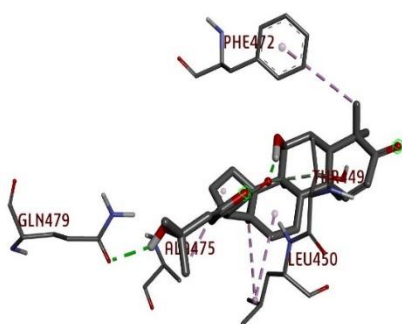

**G**

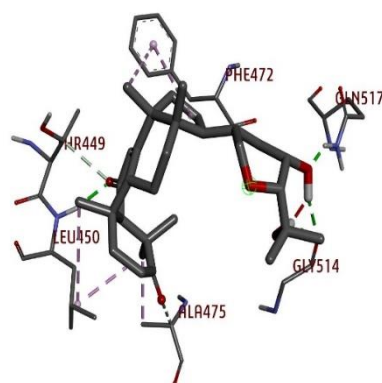

**H**



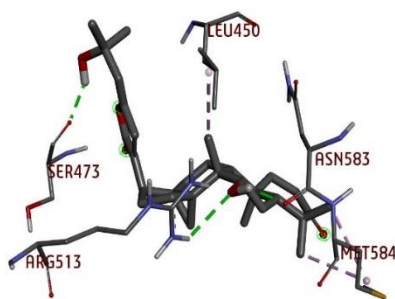

**I**

**Figure S2.** Stereoview of the binding mode of nine potential inhibitors of protein Mortalin (PDB ID: 3N8E). (A) Compound 21; (B) Compound 22; (C) Compound 19; (D) Compound 34; (E) Compound 38; (F) Compound 16; (G) Compound 17; (H) Compound 14; (I) Compound 18

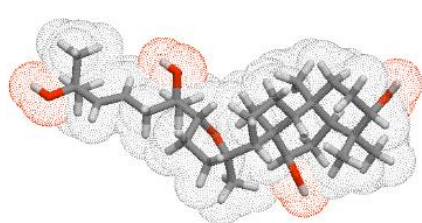

**A**

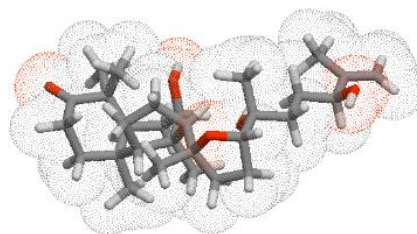

**B**

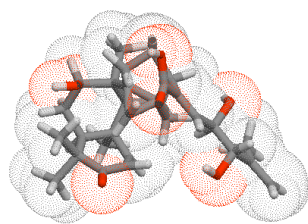

**C**

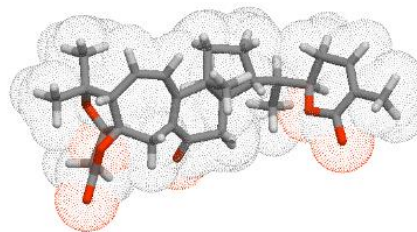

**D**

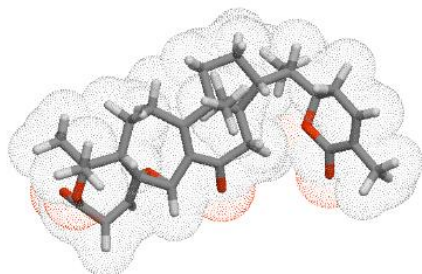

**E**

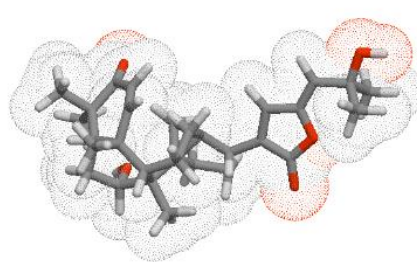

**F**

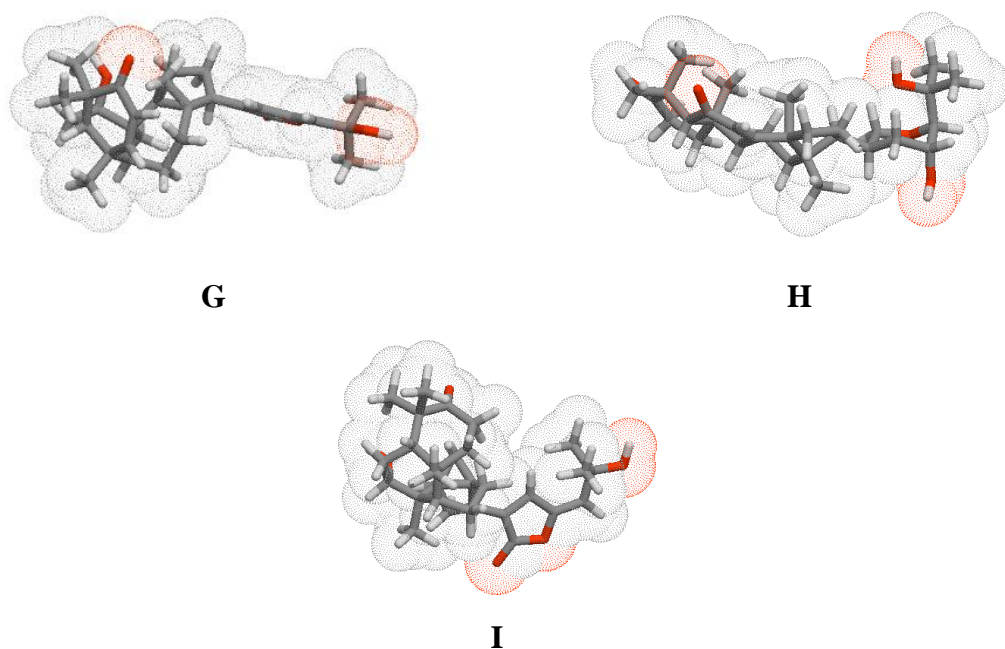

**Figure S3.** Maps of total polar surface area (TPSA) of nine potential compounds showing the nonpolar area (gray white color) and polar area (red color). (A) Compound 21; (B) Compound 22; (C) Compound 19; (D) Compound 34; (E) Compound 38; (F) Compound 16; (G) Compound 17; (H) Compound 14; (I) Compound 18
